# Supplementary material
Source: publisher figshare collection journal article supplement (https://frontiersin.figshare.com/ndownloader/files/17907488)
Supplement: Supplementary file 1 [file 17907488]

## Sheet: Sheet1
Supplementary Table S5: Statistical results of BioGeoBEARS analysis of six biogeographic models. Pairwise comparison of LnLs of nested models and resulting LRT p-value. AIC and AICc are shown with corresponding model weight.
Model	LnL	LRT p-val	AIC	AICwt	AICc	AICcwt
DEC	-44.54	3.0e-08	93.08	2.6e-07	93.43	3.2e-07
DEC+J	-29.19		64.37	0.46	65.08	0.46
DIVALIKE	-41.65	5.8e-07	87.29	4.9e-06	87.63	5.9e-06
DIVALIKE+J	-29.16		64.31	0.48	65.02	0.48
BAYAREALIKE	-55.95	2.0e-12	115.9	3.0e-12	116.2	3.5e-12
BAYAREALIKE+J	-31.2		68.41	0.06	69.11	0.06
